# Supplementary material for: Junction-configuration-dependent interfacial electronic states of a monolayer MoS2/metal contact
Source: Royal Society of Chemistry journal article supplement (doi:10.1039/c8tc04341h), 2019-01-01
Supplement: c8tc04341h1.pdf [file c8tc04341h1.pdf]

## Supporting Information for

# Junction-Configuration-Dependent Interfacial Electronic States of Monolayer MoS<sub>2</sub>/Metal Contact

Qinglong Fang <sup>a</sup>, Xumei Zhao <sup>b</sup>, Yuhong Huang <sup>c</sup>, Kewei Xu <sup>a,d</sup>, Tai Min <sup>a</sup>, and Fei Ma <sup>a,\*</sup>

<sup>a</sup> *State Key Laboratory for Mechanical Behavior of Materials, Xi'an Jiaotong University,  
Xi'an 710049, Shaanxi, China*

<sup>b</sup> *College of Materials Science and Engineering, Shaanxi Normal University, Xi'an  
710062, Shaanxi, China*

<sup>c</sup> *College of Physics and Information Technology, Shaanxi Normal University, Xi'an  
710062, Shaanxi, China*

<sup>d</sup> *Department of Physics and Opt–electronic Engineering, Xi'an University of Arts and  
Science, Xi'an 710065, Shaanxi, China*

\* Corresponding authors.

E-mail addresses: [mafei@mail.xjtu.edu.cn](mailto:mafei@mail.xjtu.edu.cn) (F. Ma).

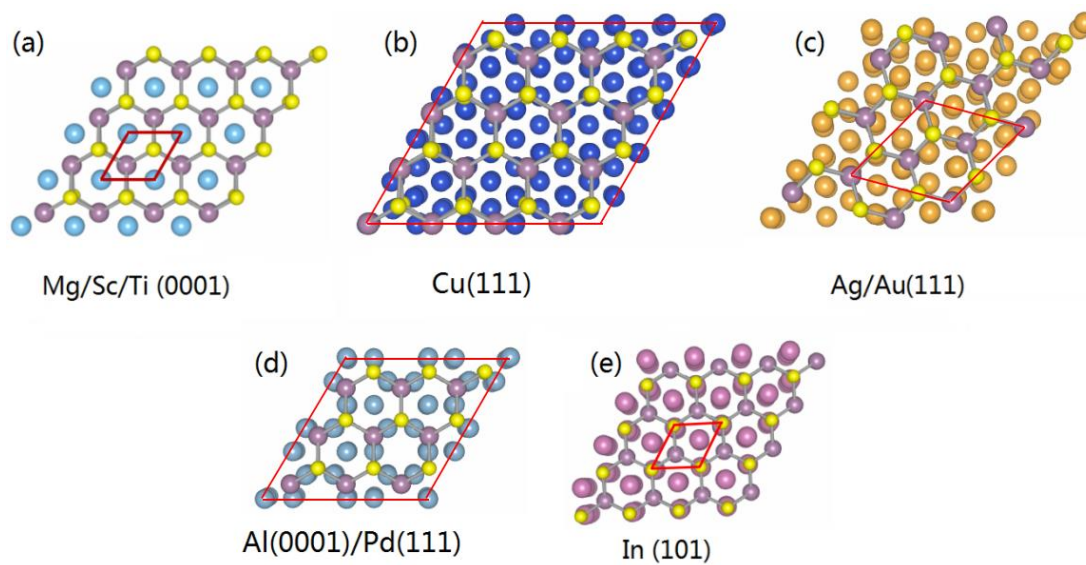

**Fig. S1** Top view of interfacial structures for monolayer MoS<sub>2</sub> contacted with metals in the top contact configuration: (a) Mg, Sc, and Ti(0001), (b) Cu(111), (c) Ag and Au, (d) Al(0001) and Pd(111), and (e) In(101) faces. The rhombi plotted in red line shows the unit cell for each structure.

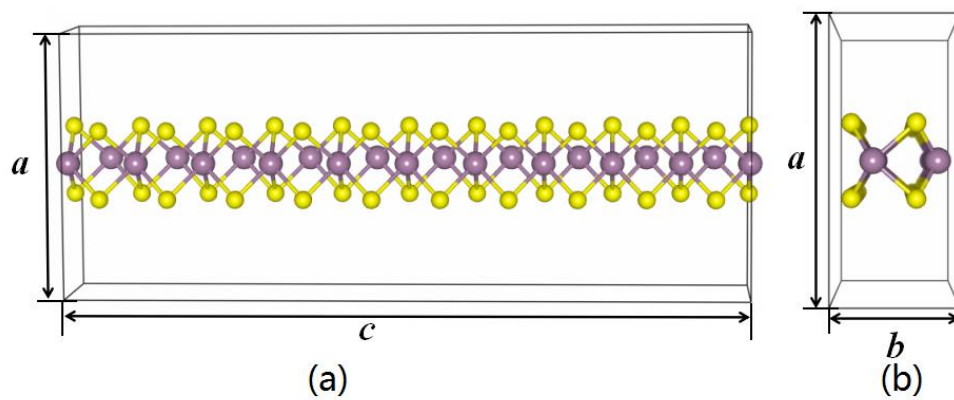

**Fig. S2** Side views of the atomic structure for monolayer MoS<sub>2</sub> nanoribbon.

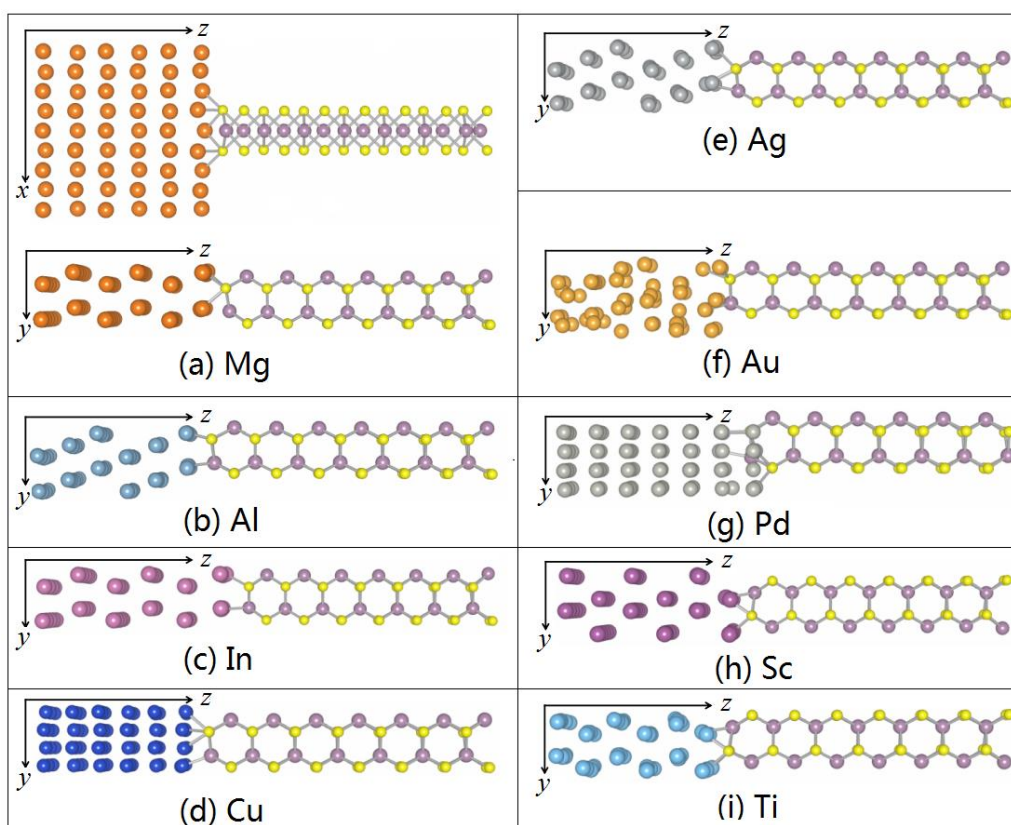

**Fig. S3** Side view of interfacial structures for monolayer MoS<sub>2</sub> contacted with metals in the edge contact configuration through Mo and S atoms at armchair termination: (a) Mg, (b) Al, (c) In, (d) Cu, (e) Ag, (f) Au, (g) Pd, (h) Sc, and (i) Ti.

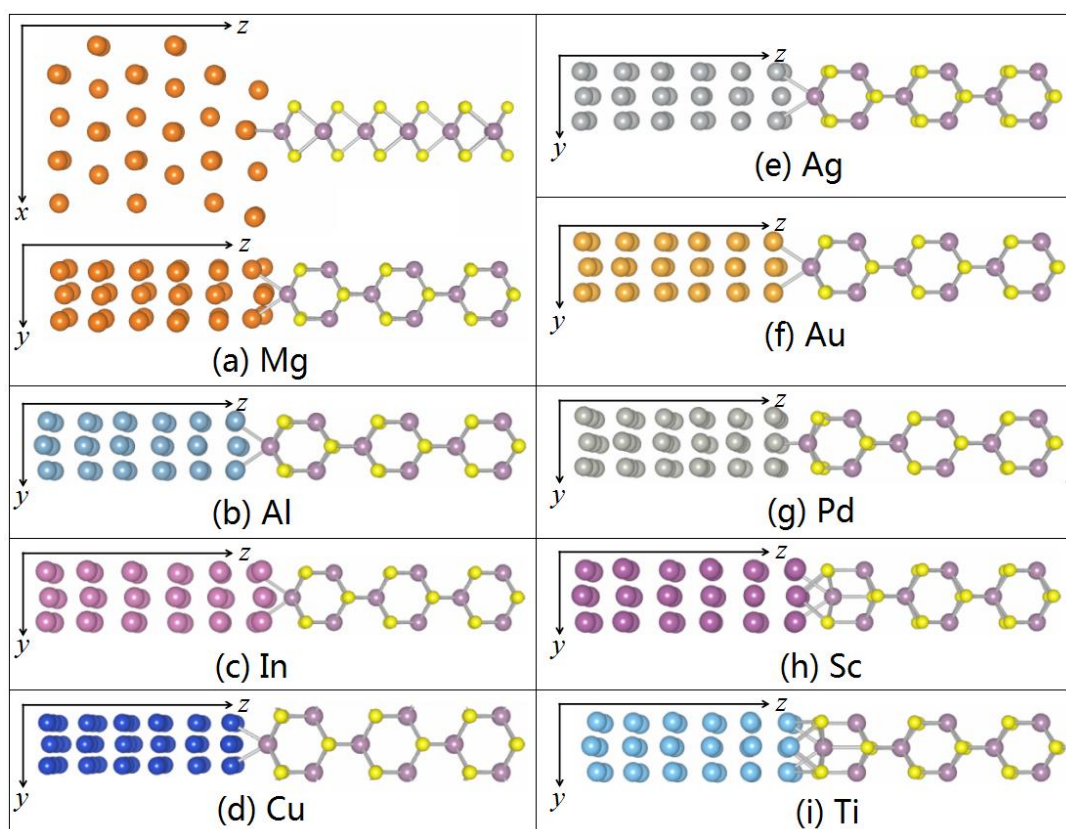

**Fig. S4** Side view of interfacial structures of monolayer MoS<sub>2</sub> contacted with metals in the edge contact configuration through Mo atoms at zigzag termination: (a) Mg, (b) Al, (c) In, (d) Cu, (e) Ag, (f) Au, (g) Pd, (h) Sc, and (i) Ti.

**Table S1** Bond lengths of metal-Mo ( $L_{\text{metal-Mo}}$ ), metal-S ( $L_{\text{metal-S}}$ ), and Mo-S ( $L_{\text{Mo-S}}$ ) in the interfaces of monolayer MoS<sub>2</sub> contacted with metals in the edge contact configuration through Mo and S atoms at armchair termination .

|    | $L_{\text{Metal-Mo}} (\text{\AA})$ | $L_{\text{Metal-S}} (\text{\AA})$ | $L_{\text{Mo-S}} (\text{\AA})$ |
|----|------------------------------------|-----------------------------------|--------------------------------|
| Mg | 2.805                              | 2.565                             | 2.461                          |
| Al | 2.667                              | 2.363                             | 2.442                          |
| In | 2.869                              | 2.744                             | 2.406                          |
| Cu | 2.433                              | 2.312                             | 2.433                          |
| Ag | 2.825                              | 2.610                             | 2.380                          |
| Au | 2.783                              | 2.658                             | 2.341                          |
| Pd | 2.460                              | 2.303                             | 2.443                          |
| Sc | 2.822                              | 2.577                             | 2.531                          |
| Ti | 2.708                              | 2.485                             | 2.505                          |

**Table S2** Bond lengths of metal-Mo ( $L_{\text{metal-Mo}}$ ) and Mo-S ( $L_{\text{Mo-S}}$ ) in the interfaces of monolayer MoS<sub>2</sub> contacted with metals in the edge contact configuration through Mo atoms at zigzag termination .

|    | $L_{\text{Metal-Mo}} (\text{\AA})$ | $L_{\text{Mo-S}} (\text{\AA})$ |
|----|------------------------------------|--------------------------------|
| Mg | 2.813                              | 2.404                          |
| Al | 2.655                              | 2.358                          |
| In | 2.879                              | 2.414                          |
| Cu | 2.549                              | 2.419                          |
| Ag | 2.828                              | 2.355                          |
| Au | 2.756                              | 2.364                          |
| Pd | 2.776                              | 2.353                          |
| Sc | 2.905                              | 2.424                          |
| Ti | 2.612                              | 2.551                          |

**Table S3** Bond lengths of metal-S ( $L_{\text{metal-S}}$ ) and Mo-S ( $L_{\text{Mo-S}}$ ) in the interfaces of monolayer MoS<sub>2</sub> contacted with metals in the edge contact configuration through S atoms at zigzag termination .

|    | $L_{\text{Metal-S}}$ (Å) | $L_{\text{Mo-S}}$ (Å) |
|----|--------------------------|-----------------------|
| Mg | 2.480                    | 2.461                 |
| Al | 2.425                    | 2.442                 |
| In | 2.775                    | 2.406                 |
| Cu | 2.163                    | 2.433                 |
| Ag | 2.630                    | 2.380                 |
| Au | 2.480                    | 2.341                 |
| Pd | 2.342                    | 2.443                 |
| Sc | 2.543                    | 2.531                 |
| Ti | 2.361                    | 2.505                 |



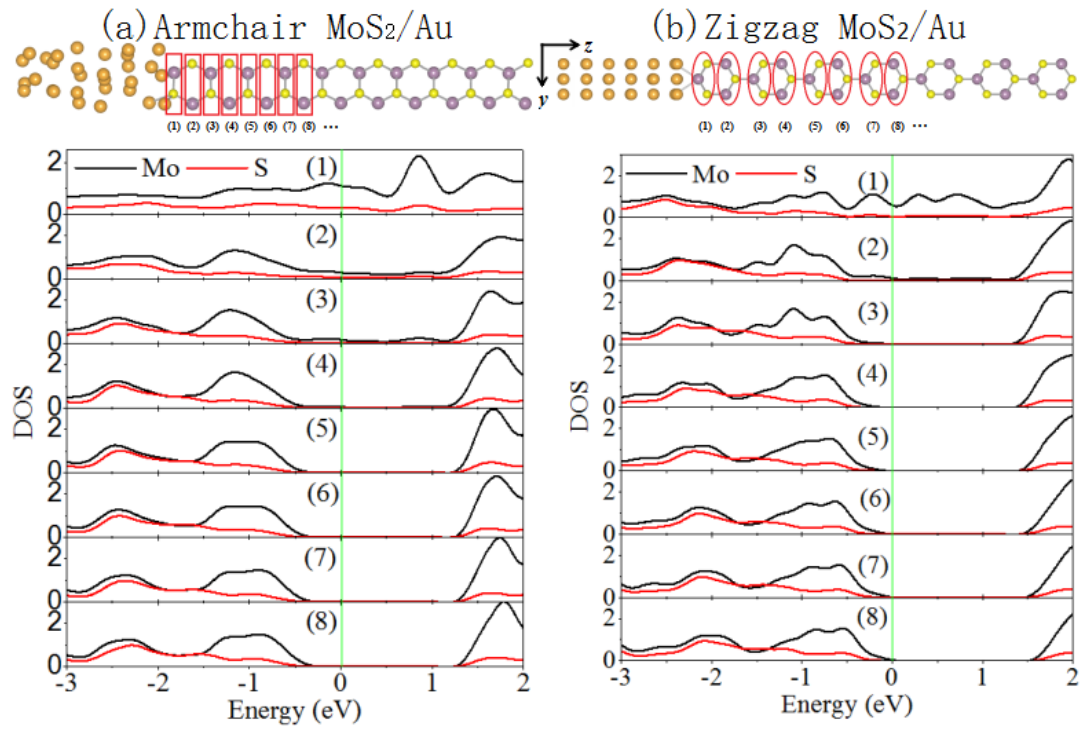

**Fig. S5** Atomic structure and PDOSs projected on each Mo and S atoms of MoS<sub>2</sub> nanoribbon contacted with Au electrodes in the edge contact configurations: (a) armchair MoS<sub>2</sub> nanoribbon and (b) zigzag MoS<sub>2</sub> nanoribbon with Mo atom termination.

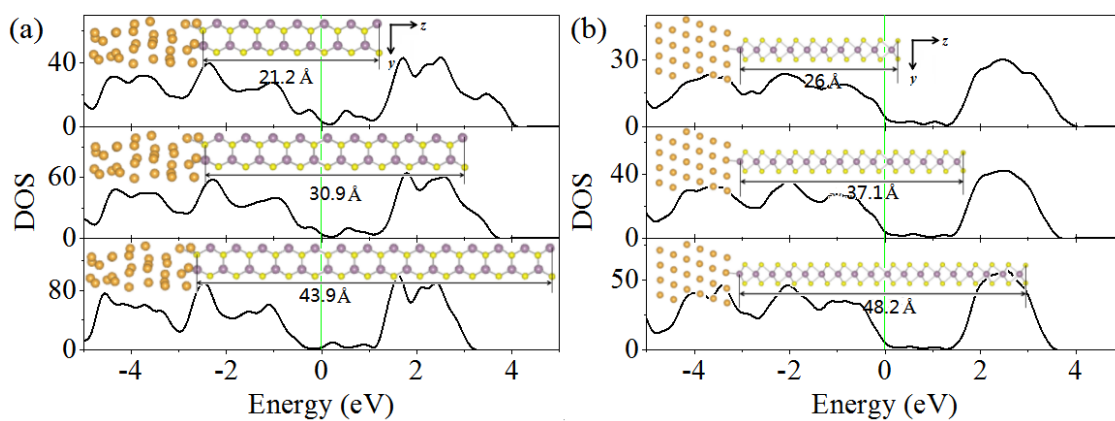

**Fig. S6** Density of states (DOS) of MoS<sub>2</sub> nanoribbon contacted with Au electrodes in the edge contact configurations: (a) armchair MoS<sub>2</sub> nanoribbon and (b) zigzag MoS<sub>2</sub> nanoribbon with Mo atom termination.

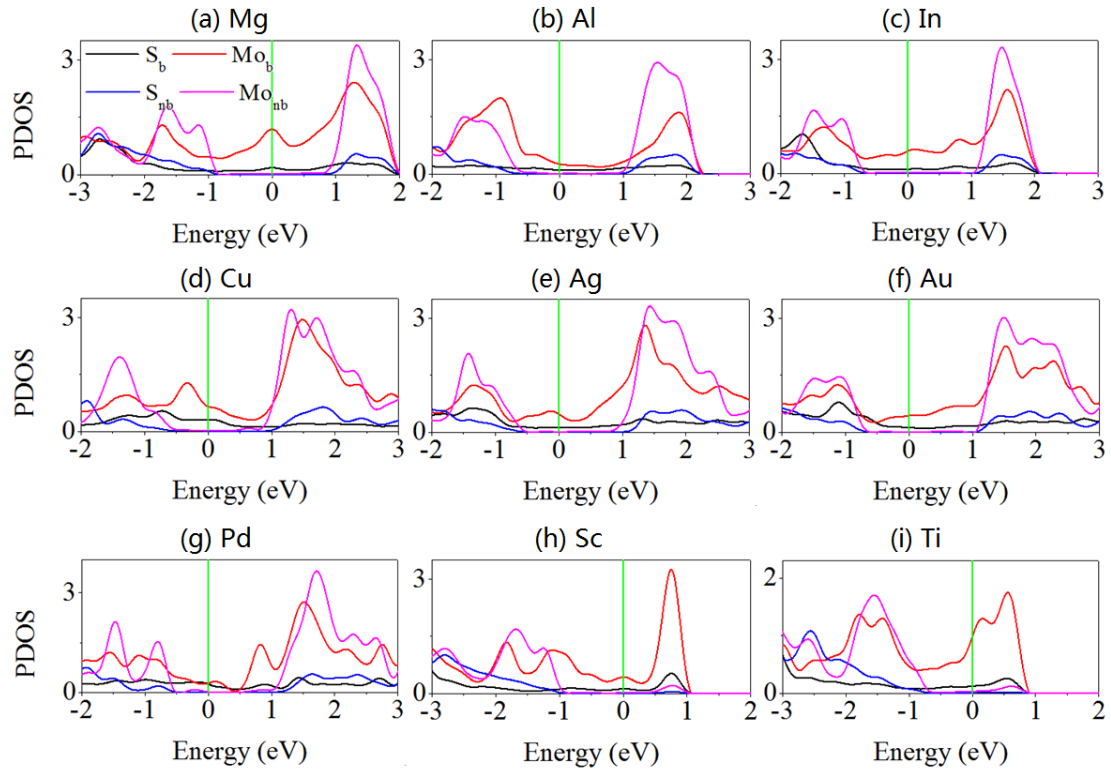

**Fig. S7** Electronic density of states (DOS) of monolayer MoS<sub>2</sub> contacted with metals in the edge contact configuration through Mo atoms at zigzag termination : (a) Mg, (b) Al, (c) In, (d) Cu, (e) Ag, (f) Au, (g) Pd, (h) Sc, and (i) Ti. S<sub>b</sub> (black line) and S<sub>nb</sub> (blue line) indicate the sulphur atoms at the interface and far away from interface, respectively. Similarly, Mo<sub>b</sub> (red line) and Mo<sub>nb</sub> (magenta line) are the molybdenum atoms at the interface and far away from interface, respectively.

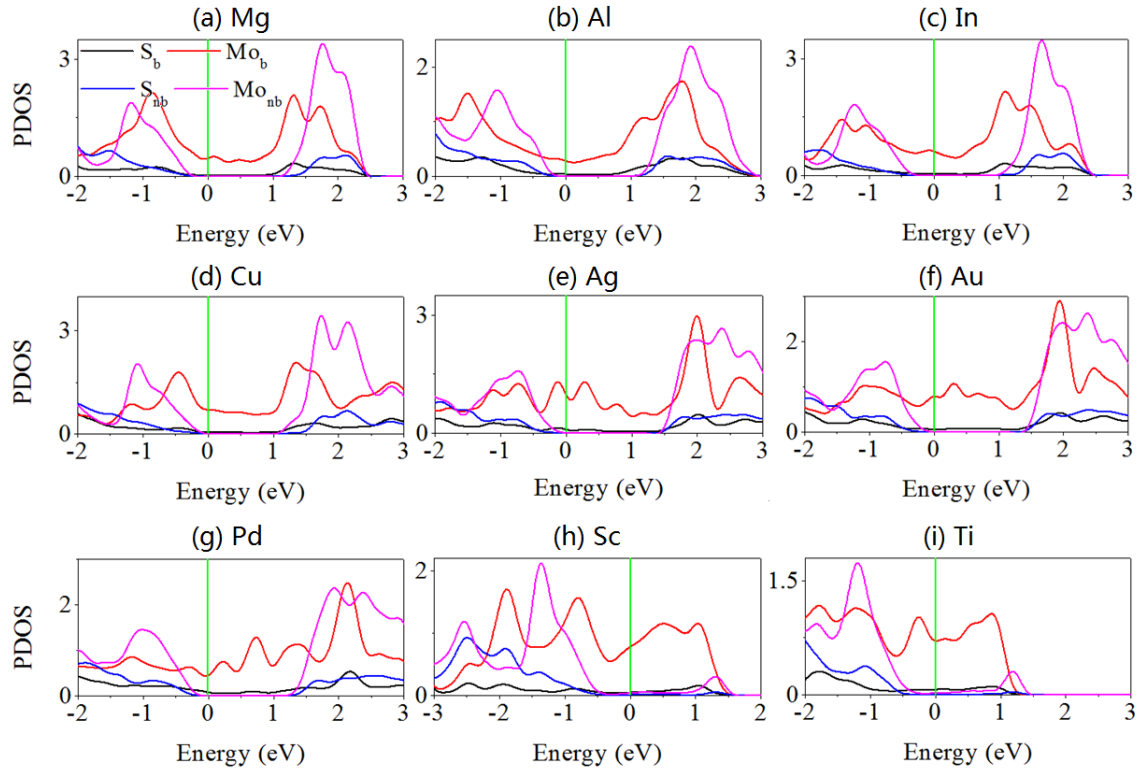

**Fig. S8** Electronic density of states (DOS) of monolayer MoS<sub>2</sub> contacted with metals in the edge contact configuration through S atoms at zigzag termination: (a) Mg, (b) Al, (c) In, (d) Cu, (e) Ag, (f) Au, (g) Pd, (h) Sc, and (i) Ti. S<sub>b</sub> (black line) and S<sub>nb</sub> (blue line) indicate the sulphur atoms at the interface and far away from interface, respectively. Similarly, Mo<sub>b</sub> (red line) and Mo<sub>nb</sub> (magenta line) are the molybdenum atoms at the interface and far away from interface, respectively.

**Table S4** Experimentally and theoretically obtained SBH and pinning factor ( $S$ ) of MoS<sub>2</sub> contacted with metals in the top contact configuration.

| Metal | Work function | Thinness | SBH (eV) | Pinning factor | Ref                                                             |
|-------|---------------|----------|----------|----------------|-----------------------------------------------------------------|
| Ag    | 4.3           |          | 0.04     |                |                                                                 |
| Cu    | 4.6           |          | 0.1      |                |                                                                 |
| Au    | 5.1           | 7~30     | 0.06     | 0.09           | Y. Liu et al., Nature 2018, 557, 696-700                        |
| Pd    | 5.3           |          | 0.12     |                |                                                                 |
| Ti    | 4.3           |          | 0.23     |                |                                                                 |
| Au    | 5.2           | bulk     | 0.32     | 0.11           | C. Kim et al., ACS Nano 2017, 11, 1588-1596                     |
| Pd    | 5.6           |          | 0.30     |                |                                                                 |
| Ti    | 4.3           |          | 0.35     |                |                                                                 |
| In    | 4.1           |          | 0.47     | 0.34           | J. Kang et al., Phys. Rev. X 2014, 4, 031005                    |
| Au    | 5.3           | mono     | 0.62     |                |                                                                 |
| Pd    | 5.6           |          | 0.9      |                |                                                                 |
| Sc    | 3.5           |          | -0.1     |                |                                                                 |
| Mg    | 3.7           |          | 0.12     |                |                                                                 |
| Al    | 4.27          |          | 0.23     | 0.28           | Y. Guo et al., ACS Appl. Mater. Interfaces 2015, 7, 25709-25715 |
| Ti    | 4.33          | mono     | 0.41     |                |                                                                 |
| Pd    | 5.13          |          | 0.66     |                |                                                                 |
| Al    | 4.24          |          | 0.51     |                |                                                                 |
| Ag    | 5.14          |          | 0.54     |                |                                                                 |
| Au    | 5.76          | mono     | 0.88     | 0.27           | C. Gong et al., Nano Lett 2014, 14, 1714-1720                   |
| Pd    | 5.83          |          | 0.85     |                |                                                                 |
| Sc    | 3.593         |          | 0        |                |                                                                 |
| Ti    | 4.427         |          | 0.216    | 0.33           |                                                                 |
| Ag    | 4.489         | mono     | 0.212    |                |                                                                 |
| Au    | 5.226         |          | 0.763    |                | H.X. Zhong et al., Sci Rep 2016, 6, 21786                       |
| Sc    | 3.593         |          | 0        |                |                                                                 |
| Ti    | 4.427         |          | 0.161    | 0.27           |                                                                 |
| Ag    | 4.489         | bi       | 0.138    |                |                                                                 |
| Au    | 5.226         |          | 0.667    |                |                                                                 |
